# Supplementary material for: A Diagnostic Assessment of Translation Competence: Linguistic and Intercultural Gaps in Egyptian EFL Programs
Source: Research Square preprint supplement (doi:10.21203/rs.3.rs-7511304/v1), 2025-09-16
Supplement: Supplementary file 1 [file 00c62aa8aef0e8ee02a2eff3.xlsx]

## Sheet: Sheet1
Word	Length	Count	Weighted Percentage (%)	Similar Words
translation	11	173	12.97	translating, translation, translations, understanding
cultural	8	55	4.23	content, cultural, culturally, culture, political
exercises	9	78	3.06	drills, exercises, manual, practical, practice, practiced, review, technology, tone, training, use, using
covered	7	60	2.8	addressed, case, covered, cross, dealing, discuss, flow, handling, include, paper, report, reports
abstract	8	119	2.79	abstract, abstracts, accuracy, balance, brief, business, consistency, content, device, document, due, enough, fluency, free, group, humor, increase, jargon, language, narrative, need, offer, poetry, practice, resolution, speech, story, structure, style, syntax, time, tone, use, vocabulary, world, writing
content	7	93	2.64	abstract, agreement, business, challenge, content, contract, culture, curriculum, guide, humor, irony, narrative, news, offer, report, resolution, sarcasm, science, specification, story, style, technology, understanding, wordplay, world
include	7	44	2.13	add, include, incorporate
studies	7	68	1.8	document, english, immersion, literature, papers, practice, report, reports, review, science, studies, technology
skills	6	45	1.66	fluency, practiced, science, skills, technical
tasks	5	25	1.57	business, projects, tasks
modules	7	54	1.37	focus, immersion, language, modules, sensitivity, speech, tone, understanding
language	8	38	1.31	ambiguity, dialect, egyptian, idiom, jargon, language, phrase, proverb, sentence, slang, speech, speeches, text
academic	8	17	1.29	academic, world
texts	5	26	1.29	language, speech, text, texts
group	5	41	1.28	business, content, culture, english, free, group, structure, syntax, world
expressions	11	60	1.27	add, ambiguity, colloquialism, expressions, fast, idiom, introduce, language, phrase, proverb, sentence, speech, style, time
lacking	7	15	1.2	lacking, need
structures	10	20	1.19	balance, case, complex, cross, guide, story, structure, structures, syntax
technical	9	28	1.14	technical, technology
legal	5	13	1.09	legal
maintaining	11	13	1.09	maintaining
writing	7	61	1.09	adaptation, article, brief, cross, document, essay, journal, language, literature, natural, paper, papers, patent, proverbs, report, resolution, review, specification, story, style, text, tone, writing
idioms	6	21	1.07	dialect, dialects, idiom, idioms, phrase, phrases, style
dealing	7	51	1.06	abstract, agreement, business, dealing, handling, hands, management, marketing, related, understanding
arabic	6	12	1	arabic
understanding	13	41	1	agreement, agreements, coherence, contract, focus, grasp, grasping, understanding
activities	10	60	0.99	activities, business, collocation, cross, essay, festival, flow, grasp, grasping, literature, manual, offer, participant, phrase, practice, review, technology, training, use, using, writing
focused	7	17	0.96	focus, focused, immersion
emphasized	10	11	0.92	emphasized
undertaught	11	11	0.92	undertaught
devices	7	23	0.86	cat, device, devices, high, irony, metaphor, specs, style
style	5	30	0.86	colloquialism, device, fluency, idiom, jargon, poetry, speech, style, styles, tone
rarely	6	10	0.83	rarely
terminology	11	17	0.83	language, terminology
figurative	10	35	0.8	add, cross, device, figurative, grasp, irony, metaphor
literal	7	10	0.79	literal, literary
real	4	10	0.79	historical, literal, real
taught	6	9	0.75	taught
practice	8	39	0.72	practical, practice, practiced, skills, use, using
addressed	9	18	0.68	addressed, references, speech, speeches, use
increase	8	29	0.67	add, include, increase, speed
references	10	17	0.62	due, guide, manual, references, related, vocabulary
metaphors	9	10	0.61	figurative, metaphor, metaphors
workshops	9	7	0.58	workshops
manuals	7	28	0.57	manual, manuals, practice
rhetorical	10	12	0.55	rhetorical, style
document	8	27	0.52	brief, contract, document, documents, journal, paper, papers, patent, report, resolution, specification, writing
training	8	33	0.48	manual, practice, review, teach, training
colloquial	10	6	0.45	colloquial, colloquialism, colloquialisms
specific	8	17	0.45	document, limited, papers, specific, specification, specifications, specs
technology	10	6	0.43	scientific, technology
simulate	8	5	0.42	simulate
authenticity	12	9	0.41	authenticity, document, documents
courses	7	7	0.4	courses, cross, flow, natural
handling	8	17	0.4	dealing, guide, handling, management, phrase
limited	7	13	0.39	content, expressions, limited, settings, specialized, specific
paced	5	6	0.38	paced, speed
political	9	6	0.38	diplomatic, political
reviews	7	25	0.38	practice, review, reviews
sensitive	9	6	0.38	sensitive, sensitivity
consistency	11	8	0.35	coherence, cohesion, consistency
medical	7	8	0.35	medical, specific
terms	5	8	0.34	sentence, terms, time
idiomatic	9	4	0.33	idiomatic
norms	5	4	0.33	norm, norms
strategies	10	4	0.33	strategies
weak	4	4	0.33	exposure, weak
proverbs	8	9	0.32	proverb, proverbs
articles	8	7	0.31	article, articles, paper
contract	8	6	0.31	contract, contracts
loaded	6	12	0.31	handling, loaded
specialized	11	14	0.31	adaptation, immersion, offer, specialized, specific
narratives	10	10	0.3	content, narrative, narratives, report, stories, story
fast	4	8	0.29	fast, speed
settings	8	16	0.29	balance, focus, group, hard, introduce, settings, structure, time
need	4	4	0.28	need, pressure
report	6	12	0.28	news, report, reports, stories, story
balancing	9	5	0.27	balance, balancing, structure
context	7	4	0.27	context, contexts, settings
drills	6	9	0.27	drills, teach, training
natural	7	25	0.27	natural, practice, world
collocations	12	6	0.26	collocation, collocations, group
discuss	7	12	0.26	discuss, discussed, language, participant, speech
adaptation	10	11	0.25	adaptation, adapting, device, focus, writing
financial	9	3	0.25	financial
journalistic	12	3	0.25	journalistic
long	4	3	0.25	long
phrasal	7	3	0.25	phrasal
religious	9	3	0.25	religious
taboos	6	3	0.25	taboo, taboos
techniques	10	3	0.25	techniques
verbs	5	3	0.25	verb, verbs
western	7	3	0.25	western
childrenâ	9	3	0.25	childrenâ
media	5	3	0.25	media
underexplored	13	3	0.25	underexplored
topics	6	5	0.24	case, content, local, topics
briefs	6	5	0.23	abstract, brief, briefs
paper	5	15	0.23	article, essay, paper, papers, report, reports
patent	6	9	0.22	document, papers, patent, patents
projects	8	10	0.22	figurative, introduce, offer, projects, structure
tools	5	8	0.22	style, tools
essay	5	11	0.21	essay, essays, paper, report, writing
festivals	9	3	0.21	festival, festivals
guides	6	4	0.19	guide, guides, structure
marketing	9	8	0.19	marketing, offer
business	8	13	0.18	business, literature, paper, technology
insufficient	12	2	0.17	insufficient
nuances	7	2	0.17	nuances
related	7	8	0.17	agreement, article, balance, collocation, flow, related, speed
sentence	8	6	0.17	sentence, sentences, time
speech	6	14	0.17	speech, speeches, style, tone
journal	7	5	0.16	journal, journals, writing
syntax	6	5	0.16	grammar, structure, syntax
science	7	4	0.15	grammar, science
ambiguity	9	3	0.14	ambiguity, ambiguous
sufficiently	12	2	0.13	enough, sufficiently
differences	11	2	0.1	balance, differences
hands	5	5	0.1	free, guide, hands, writing
100	3	1	0.08	100
accurately	10	1	0.08	accurately
approaches	10	1	0.08	approaches
avoided	7	1	0.08	avoided
awareness	9	1	0.08	awareness
deadlines	9	1	0.08	deadlines
effectively	11	1	0.08	effectively
electives	9	1	0.08	electives
gaps	4	1	0.08	gaps
hard	4	3	0.08	consistency, hard
native	6	1	0.08	native
stories	7	4	0.08	stories, story, structure
suggestions	11	1	0.08	suggestions
syntactic	9	1	0.08	syntactic
unfamiliar	10	1	0.08	unfamiliar
biggest	7	1	0.08	biggest
challenge	9	2	0.07	challenge, hard
local	5	2	0.06	local, settings
time	4	3	0.05	case, time
