# Supplementary material for: A Diagnostic Assessment of Translation Competence: Linguistic and Intercultural Gaps in Egyptian EFL Programs
Source: Research Square preprint supplement (doi:10.21203/rs.3.rs-7511304/v1), 2025-09-16
Supplement: Supplementary file 1 [file 94d25bd1e0d98a133d86db33.pdf]

## Participant Biggest\_Ch Language\_ Suggestions

- 1 Maintaining Idioms and More real-world translation projects and cultural immersion activities.
- 2 Understanding Syntactic s Incorporate more syntax-focused exercises.
- 3 Translating Technical v Add specialized vocabulary workshops.
- 4 Cultural nu Cultural tra Include cross-cultural studies in the curriculum.
- 5 Dealing wit Collocation More practice with collocation exercises.
- 6 Translating Cultural co Incorporate case studies on cultural translation.
- 7 Balancing s Practical e Increase hands-on translation tasks.
- 8 Understanding Idioms are More idiom-focused translation practice.
- 9 Translating Specialize Add legal translation modules.
- 10 Grasping E Grammar e More grammar-focused translation drills.
- 11 Translating Humor and Workshops on translating humor and cultural references.
- 12 Maintaining Cohesion t More training on text coherence strategies.
- 13 Translating Scientific t Add science-specific translation courses.
- 14 Understanding Proverb tra Incorporate proverb translation exercises.
- 15 Adapting tr Egyptian cl More focus on local cultural adaptation.
- 16 Translating Business v Introduce business translation modules.
- 17 Handling f Time mana Simulate real-world translation deadlines.
- 18 Translating Literary tra Add literary translation workshops.
- 19 Understanding Western cl Include Western culture studies.
- 20 Maintaining Tone and s Practice tone-specific translation tasks.
- 21 Translating Medical ter Offer medical translation electives.
- 22 Dealing wit Ambiguity r Teach strategies for handling ambiguity.
- 23 Translating Sensitive c Discuss culturally sensitive translations.
- 24 Using CAT Technology Increase training on CAT tools.
- 25 Translating Academic v More focus on academic translation.
- 26 Understanding Slang is rar Incorporate slang translation exercises.
- 27 Translating Contract te Add legal contract translation practice.
- 28 Maintaining Arabic fluency More Arabic translation practice.
- 29 Translating Poetry tran Offer poetry translation workshops.
- 30 Understanding Humor trar Include humor-focused translation tasks.
- 31 Translating Technical r Add technical manual translation exercises.
- 32 Handling ic Arabic idiom More focus on Arabic idiomatic translation.
- 33 Translating News-spec Incorporate news translation tasks.
- 34 Understanding Phrasal ver More phrasal verb exercises.
- 35 Translating Religious t Offer religious text translation courses.
- 36 Maintaining Consistency Practice long-text translation strategies.
- 37 Translating Marketing l Add marketing translation modules.
- 38 Understanding Rhetorical d Incorporate rhetorical device exercises.
- 39 Translating Historical c Offer historical text translation practice.
- 40 Handling f Group tran Simulate group translation projects.
- 41 Translating Diplomatic Add diplomatic translation workshops.
- 42 Understanding Cultural tal Teach cultural taboo awareness.
- 43 Translating Technical r Practice technical report translations.

- 44 Maintainin Pressure n Simulate high-pressure translation tasks.
- 45 Translating Childrenâ€ Add childrenâ€™s literature translation.
- 46 Understand Dialects an Incorporate dialect-specific exercises.
- 47 Translating Abstract w More academic abstract translation tasks.
- 48 Handling c Metaphors Focus on metaphor translation strategies.
- 49 Translating Financial t Offer financial translation courses.
- 50 Maintainin Cultural au More focus on cultural authenticity.
- 51 Translating Legal agree Add legal agreement translation exercises.
- 52 Understand Irony is rare Incorporate irony-focused translation tasks.
- 53 Translating Technical s Practice technical specification translation.
- 54 Balancing l Translation Teach balancing translation approaches.
- 55 Translating Proverbs an More proverb translation practice.
- 56 Handling c Complex s More complex sentence exercises.
- 57 Translating Journalistic Add journalistic translation modules.
- 58 Understand Colloquialism Incorporate colloquialism exercises.
- 59 Translating Academic j Practice academic paper translations.
- 60 Maintainin Literary sty More literary style translation tasks.
- 61 Translating Patent term Add patent translation workshops.
- 62 Understand Humor is u Incorporate humor translation exercises.
- 63 Translating Political lar Practice political speech translations.
- 64 Handling E Wordplay is More wordplay-focused exercises.
- 65 Translating Cultural fe Add festival-related translation tasks.
- 66 Maintainin Arabic fluency More Arabic translation practice.
- 67 Translating Scientific a Practice scientific article translations.
- 68 Understand Metaphors Incorporate metaphor translation tasks.
- 69 Translating Legal docu Add legal document translation modules.
- 70 Handling c Media refer Practice media translation exercises.
- 71 Translating Technical g Add technical guide translation tasks.
- 72 Understand Sarcasm is Incorporate sarcasm-focused exercises.
- 73 Translating Cultural idi More cultural idiom translation practice.
- 74 Maintainin Speed acc Simulate fast-paced translation tasks.
- 75 Translating Historical c Add historical document translation.
- 76 Understand Cultural no Incorporate cultural norm studies.
- 77 Translating Essay trans Practice academic essay translations.
- 78 Handling t Technical t Add technical terminology workshops.
- 79 Translating Literary me More literary metaphor exercises.
- 80 Understand Humor styl Incorporate humor style translation.
- 81 Translating Business c Add business contract translation tasks.
- 82 Maintainin Arabic tone More Arabic tone-focused exercises.
- 83 Translating Cultural stor Practice cultural story translations.
- 84 Understand Rhetorical : Incorporate rhetorical style exercises.
- 85 Translating Technical p Add technical paper translation modules.
- 86 Handling f Fast trans Simulate real-time translation tasks.
- 87 Translating Proverbs an More proverb-focused translation practice.

- 88 Understand Slang term: Incorporate slang translation exercises.
- 89 Translating Academic i Practice academic review translations.
- 90 Maintaining Coherence More coherence-focused exercises.
- 91 Translating Technical r Add technical manual translation tasks.
- 92 Understand Irony is not Incorporate irony translation exercises.
- 93 Translating Legal briefs Add legal brief translation modules.
- 94 Handling c Complex st More complex structure exercises.
- 95 Translating Cultural na Practice cultural narrative translations.
- 96 Understand Wordplay i: Incorporate wordplay translation tasks.
- 97 Translating Technical r Add technical report translation exercises.
- 98 Maintaining Cultural se More cultural sensitivity training.
- 99 Translating Journal trar Practice academic journal translations.
- 100 Understand Colloquial Incorporate colloquial phrase exercises.
