# Supplementary material for: A Diagnostic Assessment of Translation Competence: Linguistic and Intercultural Gaps in Egyptian EFL Programs
Source: Research Square preprint supplement (doi:10.21203/rs.3.rs-7511304/v1), 2025-09-16
Supplement: Supplementary file 2 [file 7e184c1e3800ff8680b23f26.docx]

**Challenges in EFL Translation Preparation Questionnaire**

**Dear Participant,**

Thank you for taking the time to participate in this research study. Your honest responses will help us understand the challenges faced by EFL students in translation programs at Egyptian universities. Your participation is voluntary, and your responses will be kept confidential and used solely for academic purposes.

**Part 1: Demographic Information**

1. **Age:** ___________
2. **Gender:**
   - Male
   - Female
   - Prefer not to say
3. **Year of Study:**
   - First Year
   - Second Year
   - Third Year
   - Fourth Year
   - Postgraduate
4. **Major/Specialization (if applicable):** _________________________
5. **How many years have you been studying English as a Foreign Language (EFL)?** ___________ years
6. **How long have you been formally studying translation?** ___________ years

**Part 2: Linguistic Deficiencies**

*Please rate your agreement with the following statements on a scale of 1 to 5, where 1 = Strongly Disagree, 2 = Disagree, 3 = Neutral, 4 = Agree, 5 = Strongly Agree.*

| **Statement** | **1** | **2** | **3** | **4** | **5** |
| --- | --- | --- | --- | --- | --- |
| 7. I find it challenging to maintain grammatical accuracy in my translations. |  |  |  |  |  |
| 8. My vocabulary range in English is insufficient for accurate translation of specialized texts. |  |  |  |  |  |
| 9. I struggle with understanding and correctly translating idiomatic expressions in English. |  |  |  |  |  |
| 10. I find it difficult to grasp the syntactic structures of English for accurate Arabic translation. |  |  |  |  |  |
| 11. Translating technical or specialized jargon (e.g., scientific, legal, business) is a major challenge for me. |  |  |  |  |  |
| 12. I often face difficulties with collocations (words that naturally go together in English). |  |  |  |  |  |
| 13. My translations sometimes lack academic cohesion and coherence. |  |  |  |  |  |

**Part 3: Intercultural Competence and Cultural Awareness**

*Please rate your agreement with the following statements on a scale of 1 to 5, where 1 = Strongly Disagree, 2 = Disagree, 3 = Neutral, 4 = Agree, 5 = Strongly Agree.*

| **Statement** | **1** | **2** | **3** | **4** | **5** |
| --- | --- | --- | --- | --- | --- |
| 14. I understand the cultural context of English proverbs and idioms well enough to translate them accurately. |  |  |  |  |  |
| 15. I am aware of cultural differences that might make direct translation of certain expressions inappropriate. |  |  |  |  |  |
| 16. I find it challenging to translate culturally loaded texts that require a deep understanding of Western or other cultures. |  |  |  |  |  |
| 17. I have sufficient knowledge of Egyptian culture to effectively translate Arabic cultural references into English. |  |  |  |  |  |
| 18. I find it difficult to interpret or translate terms and expressions related to socio-cultural issues from English into Arabic. |  |  |  |  |  |

**Part 4: Pedagogical Approaches and Curriculum Design**

*Please rate your agreement with the following statements on a scale of 1 to 5, where 1 = Strongly Disagree, 2 = Disagree, 3 = Neutral, 4 = Agree, 5 = Strongly Agree.*

| **Statement** | **1** | **2** | **3** | **4** | **5** |
| --- | --- | --- | --- | --- | --- |
| 19. My translation courses provide sufficient opportunities for practical translation exercises. |  |  |  |  |  |
| 20. The balance between theory and practice in my translation courses is appropriate. |  |  |  |  |  |
| 21. My instructors effectively explain the pedagogical approaches used in translation classes. |  |  |  |  |  |
| 22. The curriculum adequately covers the linguistic and cultural aspects necessary for effective translation. |  |  |  |  |  |
| 23. I feel my university program adequately prepares me for the demands of the professional translation market. |  |  |  |  |  |
| 24. My instructors are well-equipped to teach translation, possessing specialist knowledge in the field. |  |  |  |  |  |
| 25. The use of technology (e.g., CAT tools, AI translators) in my translation courses is effective in developing my skills. |  |  |  |  |  |
| 26. My university program encourages the development of critical thinking skills essential for translation problem-solving. |  |  |  |  |  |
| 27. Class sizes in my translation courses are generally appropriate for effective learning and interaction. |  |  |  |  |  |

**Part 5: Open-Ended Questions**

*Please provide detailed answers to the following questions.*

1. What do you consider to be the single biggest challenge you face in your translation studies? Please explain why.
   ________________________________________________________________________________________________________________________________________________________________________________________________________________________________________________________________________________________________________________________________________________________________________________________________________________________________________________
2. Are there any specific areas of language (e.g., grammar, vocabulary, idioms) or culture that you feel are not adequately covered in your translation program? Please elaborate.
   __________________________________________________________________________________________________________________________________________________________________________________________________________________________________________________________________________________________________________________________________________________________________________________________________________________________________________________________________
3. What suggestions do you have for improving the quality of translation training at your university?
