# Supplementary material for: A Diagnostic Assessment of Translation Competence: Linguistic and Intercultural Gaps in Egyptian EFL Programs
Source: Research Square preprint supplement (doi:10.21203/rs.3.rs-7511304/v1), 2025-09-16
Supplement: Supplementary file 3 [file 8711260708c212a74ea41b1f.docx]

**Classroom Observation Checklist**

**Observer:** _________________________
**Date:** _________________________
**Course/Subject:** _________________________
**Instructor:** _________________________
**Class Size:** _________
**Duration of Observation:** _________ minutes

**Instructions:** Please observe the following aspects of the classroom environment and teaching practice. Check the boxes that best describe what you observe and provide brief notes where indicated.

**I. Classroom Environment & Atmosphere**

| **Aspect** | **Observed (Check)** | **Notes/Examples** |
| --- | --- | --- |
| **Learning Atmosphere** |  |  |
| conducive to learning | [ ] |  |
| somewhat distracting | [ ] |  |
| disruptive/unengaged | [ ] |  |
| **Student Engagement** |  |  |
| actively participating | [ ] |  |
| generally attentive | [ ] |  |
| passive/disengaged | [ ] |  |
| **Classroom Interaction** |  |  |
| student-student interaction | [ ] | e.g., group work, pair work, peer feedback |
| student-teacher interaction | [ ] | e.g., Q&A, discussions, individual feedback |
| teacher-dominant | [ ] |  |
| balanced interaction | [ ] |  |

**II. Teaching Methodology & Delivery**

| **Aspect** | **Observed (Check)** | **Notes/Examples** |
| --- | --- | --- |
| **Pedagogical Approach** |  |  |
| heavily theoretical | [ ] |  |
| strong practical application focus | [ ] |  |
| balanced theory and practice | [ ] |  |
| use of translation exercises/tasks | [ ] | type of exercises, complexity |
| use of authentic materials (texts, media) | [ ] |  |
| use of technology (e.g., CAT tools, online resources) | [ ] | specific tools, integration level |
| emphasis on linguistic aspects (grammar, vocab) | [ ] |  |
| emphasis on cultural aspects (context, norms) | [ ] |  |
| **Instructor's Delivery** |  |  |
| clear explanations | [ ] |  |
| engaging presentation style | [ ] |  |
| uses examples effectively | [ ] |  |
| provides constructive feedback (if observed) | [ ] |  |
| availability for student questions | [ ] |  |
| **Content Relevance** |  |  |
| content aligned with translation curriculum | [ ] |  |
| content relevant to translation market | [ ] |  |
| **Pace of Instruction** |  |  |
| appropriate pace | [ ] |  |
| too fast | [ ] |  |
| too slow | [ ] |  |

**III. Application of Translation Skills in Class**

| **Aspect** | **Observed (Check)** | **Notes/Examples** |
| --- | --- | --- |
| **Translation Tasks/Activities** |  |  |
| students translating independently | [ ] |  |
| students working in pairs/groups on translation | [ ] |  |
| instructor demonstrating translation process | [ ] |  |
| focus on specific translation challenges (e.g., idioms, culture) | [ ] | type of challenge addressed |
| feedback on translation work | [ ] | type of feedback (e.g., peer, instructor), how it's delivered |
| **Use of Resources** |  |  |
| students using dictionaries/glossaries | [ ] |  |
| students using online translation tools | [ ] |  |
| students consulting reference materials | [ ] |  |

**IV. General Observations & Reflections**

- What were the strengths of the observed lesson/session?
- What were the weaknesses or areas for improvement observed?
- What specific aspects of this class most vividly illustrate the challenges faced by students in translation preparation?
- Any other relevant observations:
