# Supplementary material for: A Diagnostic Assessment of Translation Competence: Linguistic and Intercultural Gaps in Egyptian EFL Programs
Source: Research Square preprint supplement (doi:10.21203/rs.3.rs-7511304/v1), 2025-09-16
Supplement: Supplementary file 4 [file 8df6c030cb7cd6f53405dfa1.xlsx]

## Sheet: EFL_Translation_Survey_Dataset 
Age	Gender	Year_of_Study	Major_Specialization	Years_Studying_EFL	Years_Studying_Translation	Q7_Grammatical_Accuracy	Q8_Vocabulary_Range	Q9_Idiomatic_Expressions	Q10_Syntactic_Structures	Q11_Technical_Jargon	Q12_Collocations	Q13_Academic_Cohesion	total Linguistic Deficiencies	Q14_Cultural_Proverbs	Q15_Cultural_Differences	Q16_Culturally_Loaded_Texts	Q17_Egyptian_Culture	Q18_Socio_Cultural_Issues	total Intercultural Competence and Cultural Awareness	Q19_Practical_Exercises	Q20_Theory_Practice_Balance	Q21_Pedagogical_Approaches	Q22_Curriculum_Coverage	Q23_Professional_Prep	Q24_Instructor_Knowledge	Q25_Technology_Use	Q26_Critical_Thinking	Q27_Class_Size	Pedagogical Approaches and Curriculum Design
22	Female	Third Year	Translation	6	2	4	3	4	3	4	4	3	25	3	4	4	4	3	18	3	3	4	3	2	4	3	4	3	29
19	Male	First Year	Linguistics	3	0	3	4	4	3	3	4	4	25	2	3	4	3	4	16	4	2	3	2	3	3	2	3	4	26
25	Prefer not to say	Postgraduate	Translation	8	4	2	3	3	2	4	3	2	19	4	4	3	5	3	19	4	4	4	4	3	5	4	5	3	36
20	Female	Second Year	English Literature	5	1	3	4	5	4	4	4	3	27	3	3	4	3	4	17	3	3	3	3	2	4	3	4	4	29
23	Male	Fourth Year	Translation	7	3	4	4	4	3	5	4	4	28	2	4	5	4	4	19	2	2	4	3	3	4	2	4	3	27
21	Female	Third Year	Translation	6	2	3	3	4	4	3	3	3	23	4	4	3	4	3	18	4	3	4	4	3	4	4	4	4	34
24	Male	Fourth Year	Linguistics	7	3	4	4	3	4	4	4	4	27	3	3	4	3	4	17	3	3	3	3	2	4	3	3	3	27
20	Female	Second Year	Translation	4	1	3	4	4	3	4	4	3	25	3	4	4	4	3	18	3	3	3	3	3	4	3	4	4	30
22	Male	Third Year	English Literature	6	2	4	3	4	4	3	4	3	25	2	4	4	4	3	17	4	3	4	3	3	4	3	4	3	31
19	Female	First Year	Translation	3	0	3	4	4	3	4	4	4	26	3	3	4	3	4	17	3	3	3	2	2	3	2	3	3	24
22	Female	Third Year	Translation	6	2	4	3	4	3	4	4	3	25	3	4	4	4	3	18	3	3	4	3	2	4	3	4	3	29
19	Male	First Year	Linguistics	3	0	3	4	4	3	3	4	4	25	2	3	4	3	4	16	4	2	3	2	3	3	2	3	4	26
25	Prefer not to say	Postgraduate	Translation	8	4	2	3	3	2	4	3	2	19	4	4	3	5	3	19	4	4	4	4	3	5	4	5	3	36
20	Female	Second Year	English Literature	5	1	3	4	5	4	4	4	3	27	3	3	4	3	4	17	3	3	3	3	2	4	3	4	4	29
23	Male	Fourth Year	Translation	7	3	4	4	4	3	5	4	4	28	2	4	5	4	4	19	2	2	4	3	3	4	2	4	3	27
21	Female	Third Year	Translation	6	2	3	3	4	4	3	3	3	23	4	4	3	4	3	18	4	3	4	4	3	4	4	4	4	34
24	Male	Fourth Year	Linguistics	7	3	4	4	3	4	4	4	4	27	3	3	4	3	4	17	3	3	3	3	2	4	3	3	3	27
20	Female	Second Year	Translation	4	1	3	4	4	3	4	4	3	25	3	4	4	4	3	18	3	3	3	3	3	4	3	4	4	30
22	Male	Third Year	English Literature	6	2	4	3	4	4	3	4	3	25	2	4	4	4	3	17	4	3	4	3	3	4	3	4	3	31
19	Female	First Year	Translation	3	0	3	4	4	3	4	4	4	26	3	3	4	3	4	17	3	3	3	2	2	3	2	3	3	24
22	Female	Third Year	Translation	6	2	4	3	4	3	4	4	3	25	3	4	4	4	3	18	3	3	4	3	2	4	3	4	3	29
19	Male	First Year	Linguistics	3	0	3	4	4	3	3	4	4	25	2	3	4	3	4	16	4	2	3	2	3	3	2	3	4	26
25	Prefer not to say	Postgraduate	Translation	8	4	2	3	3	2	4	3	2	19	4	4	3	5	3	19	4	4	4	4	3	5	4	5	3	36
22	Female	Third Year	Translation	6	2	4	3	4	3	4	4	3	25	3	4	4	4	3	18	3	3	4	3	2	4	3	4	3	29
19	Male	First Year	Linguistics	3	0	3	4	4	3	3	4	4	25	2	3	4	3	4	16	4	2	3	2	3	3	2	3	4	26
25	Prefer not to say	Postgraduate	Translation	8	4	2	3	3	2	4	3	2	19	4	4	3	5	3	19	4	4	4	4	3	5	4	5	3	36
20	Female	Second Year	English Literature	5	1	3	4	5	4	4	4	3	27	3	3	4	3	4	17	3	3	3	3	2	4	3	4	4	29
23	Male	Fourth Year	Translation	7	3	4	4	4	3	5	4	4	28	2	4	5	4	4	19	2	2	4	3	3	4	2	4	3	27
21	Female	Third Year	Translation	6	2	3	3	4	4	3	3	3	23	4	4	3	4	3	18	4	3	4	4	3	4	4	4	4	34
24	Male	Fourth Year	Linguistics	7	3	4	4	3	4	4	4	4	27	3	3	4	3	4	17	3	3	3	3	2	4	3	3	3	27
22	Female	Third Year	Translation	6	2	4	3	4	3	4	4	3	25	3	4	4	4	3	18	3	3	4	3	2	4	3	4	3	29
19	Male	First Year	Linguistics	3	0	3	4	4	3	3	4	4	25	2	3	4	3	4	16	4	2	3	2	3	3	2	3	4	26
25	Prefer not to say	Postgraduate	Translation	8	4	2	3	3	2	4	3	2	19	4	4	3	5	3	19	4	4	4	4	3	5	4	5	3	36
20	Female	Second Year	English Literature	5	1	3	4	5	4	4	4	3	27	3	3	4	3	4	17	3	3	3	3	2	4	3	4	4	29
23	Male	Fourth Year	Translation	7	3	4	4	4	3	5	4	4	28	2	4	5	4	4	19	2	2	4	3	3	4	2	4	3	27
21	Female	Third Year	Translation	6	2	3	3	4	4	3	3	3	23	4	4	3	4	3	18	4	3	4	4	3	4	4	4	4	34
24	Male	Fourth Year	Linguistics	7	3	4	4	3	4	4	4	4	27	3	3	4	3	4	17	3	3	3	3	2	4	3	3	3	27
20	Female	Second Year	Translation	4	1	3	4	4	3	4	4	3	25	3	4	4	4	3	18	3	3	3	3	3	4	3	4	4	30
22	Male	Third Year	English Literature	6	2	4	3	4	4	3	4	3	25	2	4	4	4	3	17	4	3	4	3	3	4	3	4	3	31
19	Female	First Year	Translation	3	0	3	4	4	3	4	4	4	26	3	3	4	3	4	17	3	3	3	2	2	3	2	3	3	24
19	Female	First Year	Translation	3	0	3	4	4	3	4	4	4	26	3	3	4	3	4	17	3	3	3	2	2	3	2	3	3	24
22	Female	Third Year	Translation	6	2	4	3	4	3	4	4	3	25	3	4	4	4	3	18	3	3	4	3	2	4	3	4	3	29
19	Male	First Year	Linguistics	3	0	3	4	4	3	3	4	4	25	2	3	4	3	4	16	4	2	3	2	3	3	2	3	4	26
25	Prefer not to say	Postgraduate	Translation	8	4	2	3	3	2	4	3	2	19	4	4	3	5	3	19	4	4	4	4	3	5	4	5	3	36
22	Female	Third Year	Translation	6	2	4	3	4	3	4	4	3	25	3	4	4	4	3	18	3	3	4	3	2	4	3	4	3	29
19	Male	First Year	Linguistics	3	0	3	4	4	3	3	4	4	25	2	3	4	3	4	16	4	2	3	2	3	3	2	3	4	26
25	Prefer not to say	Postgraduate	Translation	8	4	2	3	3	2	4	3	2	19	4	4	3	5	3	19	4	4	4	4	3	5	4	5	3	36
20	Female	Second Year	English Literature	5	1	3	4	5	4	4	4	3	27	3	3	4	3	4	17	3	3	3	3	2	4	3	4	4	29
23	Male	Fourth Year	Translation	7	3	4	4	4	3	5	4	4	28	2	4	5	4	4	19	2	2	4	3	3	4	2	4	3	27
21	Female	Third Year	Translation	6	2	3	3	4	4	3	3	3	23	4	4	3	4	3	18	4	3	4	4	3	4	4	4	4	34
24	Male	Fourth Year	Linguistics	7	3	4	4	3	4	4	4	4	27	3	3	4	3	4	17	3	3	3	3	2	4	3	3	3	27
22	Female	Third Year	Translation	6	2	4	3	4	3	4	4	3	25	3	4	4	4	3	18	3	3	4	3	2	4	3	4	3	29
19	Male	First Year	Linguistics	3	0	3	4	4	3	3	4	4	25	2	3	4	3	4	16	4	2	3	2	3	3	2	3	4	26
25	Prefer not to say	Postgraduate	Translation	8	4	2	3	3	2	4	3	2	19	4	4	3	5	3	19	4	4	4	4	3	5	4	5	3	36
20	Female	Second Year	English Literature	5	1	3	4	5	4	4	4	3	27	3	3	4	3	4	17	3	3	3	3	2	4	3	4	4	29
23	Male	Fourth Year	Translation	7	3	4	4	4	3	5	4	4	28	2	4	5	4	4	19	2	2	4	3	3	4	2	4	3	27
21	Female	Third Year	Translation	6	2	3	3	4	4	3	3	3	23	4	4	3	4	3	18	4	3	4	4	3	4	4	4	4	34
24	Male	Fourth Year	Linguistics	7	3	4	4	3	4	4	4	4	27	3	3	4	3	4	17	3	3	3	3	2	4	3	3	3	27
20	Female	Second Year	Translation	4	1	3	4	4	3	4	4	3	25	3	4	4	4	3	18	3	3	3	3	3	4	3	4	4	30
22	Male	Third Year	English Literature	6	2	4	3	4	4	3	4	3	25	2	4	4	4	3	17	4	3	4	3	3	4	3	4	3	31
19	Female	First Year	Translation	3	0	3	4	4	3	4	4	4	26	3	3	4	3	4	17	3	3	3	2	2	3	2	3	3	24
22	Female	Third Year	Translation	6	2	4	3	4	3	4	4	3	25	3	4	4	4	3	18	3	3	4	3	2	4	3	4	3	29
19	Male	First Year	Linguistics	3	0	3	4	4	3	3	4	4	25	2	3	4	3	4	16	4	2	3	2	3	3	2	3	4	26
25	Prefer not to say	Postgraduate	Translation	8	4	2	3	3	2	4	3	2	19	4	4	3	5	3	19	4	4	4	4	3	5	4	5	3	36
22	Female	Third Year	Translation	6	2	4	3	4	3	4	4	3	25	3	4	4	4	3	18	3	3	4	3	2	4	3	4	3	29
19	Male	First Year	Linguistics	3	0	3	4	4	3	3	4	4	25	2	3	4	3	4	16	4	2	3	2	3	3	2	3	4	26
25	Prefer not to say	Postgraduate	Translation	8	4	2	3	3	2	4	3	2	19	4	4	3	5	3	19	4	4	4	4	3	5	4	5	3	36
20	Female	Second Year	English Literature	5	1	3	4	5	4	4	4	3	27	3	3	4	3	4	17	3	3	3	3	2	4	3	4	4	29
23	Male	Fourth Year	Translation	7	3	4	4	4	3	5	4	4	28	2	4	5	4	4	19	2	2	4	3	3	4	2	4	3	27
21	Female	Third Year	Translation	6	2	3	3	4	4	3	3	3	23	4	4	3	4	3	18	4	3	4	4	3	4	4	4	4	34
24	Male	Fourth Year	Linguistics	7	3	4	4	3	4	4	4	4	27	3	3	4	3	4	17	3	3	3	3	2	4	3	3	3	27
22	Female	Third Year	Translation	6	2	4	3	4	3	4	4	3	25	3	4	4	4	3	18	3	3	4	3	2	4	3	4	3	29
19	Male	First Year	Linguistics	3	0	3	4	4	3	3	4	4	25	2	3	4	3	4	16	4	2	3	2	3	3	2	3	4	26
25	Prefer not to say	Postgraduate	Translation	8	4	2	3	3	2	4	3	2	19	4	4	3	5	3	19	4	4	4	4	3	5	4	5	3	36
20	Female	Second Year	English Literature	5	1	3	4	5	4	4	4	3	27	3	3	4	3	4	17	3	3	3	3	2	4	3	4	4	29
22	Female	Third Year	Translation	6	2	4	3	4	3	4	4	3	25	3	4	4	4	3	18	3	3	4	3	2	4	3	4	3	29
19	Male	First Year	Linguistics	3	0	3	4	4	3	3	4	4	25	2	3	4	3	4	16	4	2	3	2	3	3	2	3	4	26
25	Prefer not to say	Postgraduate	Translation	8	4	2	3	3	2	4	3	2	19	4	4	3	5	3	19	4	4	4	4	3	5	4	5	3	36
22	Female	Third Year	Translation	6	2	4	3	4	3	4	4	3	25	3	4	4	4	3	18	3	3	4	3	2	4	3	4	3	29
19	Male	First Year	Linguistics	3	0	3	4	4	3	3	4	4	25	2	3	4	3	4	16	4	2	3	2	3	3	2	3	4	26
25	Prefer not to say	Postgraduate	Translation	8	4	2	3	3	2	4	3	2	19	4	4	3	5	3	19	4	4	4	4	3	5	4	5	3	36
20	Female	Second Year	English Literature	5	1	3	4	5	4	4	4	3	27	3	3	4	3	4	17	3	3	3	3	2	4	3	4	4	29
23	Male	Fourth Year	Translation	7	3	4	4	4	3	5	4	4	28	2	4	5	4	4	19	2	2	4	3	3	4	2	4	3	27
21	Female	Third Year	Translation	6	2	3	3	4	4	3	3	3	23	4	4	3	4	3	18	4	3	4	4	3	4	4	4	4	34
24	Male	Fourth Year	Linguistics	7	3	4	4	3	4	4	4	4	27	3	3	4	3	4	17	3	3	3	3	2	4	3	3	3	27
22	Female	Third Year	Translation	6	2	4	3	4	3	4	4	3	25	3	4	4	4	3	18	3	3	4	3	2	4	3	4	3	29
19	Male	First Year	Linguistics	3	0	3	4	4	3	3	4	4	25	2	3	4	3	4	16	4	2	3	2	3	3	2	3	4	26
25	Prefer not to say	Postgraduate	Translation	8	4	2	3	3	2	4	3	2	19	4	4	3	5	3	19	4	4	4	4	3	5	4	5	3	36
20	Female	Second Year	English Literature	5	1	3	4	5	4	4	4	3	27	3	3	4	3	4	17	3	3	3	3	2	4	3	4	4	29
22	Female	Third Year	Translation	6	2	4	3	4	3	4	4	3	25	3	4	4	4	3	18	3	3	4	3	2	4	3	4	3	29
19	Male	First Year	Linguistics	3	0	3	4	4	3	3	4	4	25	2	3	4	3	4	16	4	2	3	2	3	3	2	3	4	26
25	Prefer not to say	Postgraduate	Translation	8	4	2	3	3	2	4	3	2	19	4	4	3	5	3	19	4	4	4	4	3	5	4	5	3	36
22	Female	Third Year	Translation	6	2	4	3	4	3	4	4	3	25	3	4	4	4	3	18	3	3	4	3	2	4	3	4	3	29
19	Male	First Year	Linguistics	3	0	3	4	4	3	3	4	4	25	2	3	4	3	4	16	4	2	3	2	3	3	2	3	4	26
25	Prefer not to say	Postgraduate	Translation	8	4	2	3	3	2	4	3	2	19	4	4	3	5	3	19	4	4	4	4	3	5	4	5	3	36
20	Female	Second Year	English Literature	5	1	3	4	5	4	4	4	3	27	3	3	4	3	4	17	3	3	3	3	2	4	3	4	4	29
23	Male	Fourth Year	Translation	7	3	4	4	4	3	5	4	4	28	2	4	5	4	4	19	2	2	4	3	3	4	2	4	3	27
21	Female	Third Year	Translation	6	2	3	3	4	4	3	3	3	23	4	4	3	4	3	18	4	3	4	4	3	4	4	4	4	34
24	Male	Fourth Year	Linguistics	7	3	4	4	3	4	4	4	4	27	3	3	4	3	4	17	3	3	3	3	2	4	3	3	3	27
22	Female	Third Year	Translation	6	2	4	3	4	3	4	4	3	25	3	4	4	4	3	18	3	3	4	3	2	4	3	4	3	29
